# Supplementary material
Source: PubMed Central journal article supplement (PMC3473211)

1 **Supplemental Tables**

2 **Table S1: Copper, iron, and zinc content of diets.**

---

| <b>Diet</b>                 | <b>Cu (µg/g)</b> | <b>Fe (µg/g)</b> | <b>Zn (µg/g)</b> |
|-----------------------------|------------------|------------------|------------------|
| <b>Control<br/>TD.08584</b> | 8.41 ± 0.99      | 97.8 ± 3.44      | 42.3 ± 2.04      |
| <b>CuD<br/>TD.08585</b>     | 0.43 ± 0.05      | 88.0 ± 0.73      | 41.0 ± 0.94      |
| <b>FeD<br/>TD.09337</b>     | 7.39 ± 2.19      | 7.10 ± 0.70      | 43.3 ± 2.39      |

---

3

4 Metal content of diets was determined by wet ashing and flame AAS and represents the mean ±

5 SEM of 3 separate diet samples.

6

1 **Table S2: qPCR primer sequences**

| Gene           | NCBI GenBank ID | qPCR Primer Sequences                                                  | Position               | Product length (bp) |
|----------------|-----------------|------------------------------------------------------------------------|------------------------|---------------------|
| <i>Pvalb</i>   | NM_022499.2     | F: 5'-AGCCTTTACTGCTGCAGACTCCTT-3'<br>R: 5'-AGCTCATCTCCTCAATGAAGCCA-3'  | 63-86<br>203-180       | 141                 |
| <i>Enpp6</i>   | NM_001107311.1  | F: 5'-ATGGGTCAGAACCCTTGTGGATCA-3'<br>R: 5'-AGTCGAGAGCATCGCTAACTGCAT-3' | 419-442<br>592-569     | 174                 |
| <i>Hr</i>      | NM_024364.2     | F: 5'-TGGCCCTTGTAGGAAATGTCAGGA-3'<br>R: 5'-TTTCAGCTTGGTGTGATGGCTTGG-3' | 1469-1492<br>1592-1569 | 124                 |
| <i>Mbp</i>     | NM_001025291.1  | F: 5'-GACTCACACACGAGAACT-3'<br>R: 5'-CCAGCTAAATCTGCTGAG-3'             | 333-350<br>497-480     | 165                 |
| <i>Mobp</i>    | NM_012720.1     | F: 5'-TTCACCTTCCTCAACTCCAAGCGT-3'<br>R: 5'-TGCTCCTCCTTCTCAATCTGGTCT-3' | 201-224<br>336-313     | 136                 |
| <i>Agt</i>     | NM_134432.2     | F: 5'-ATCAACAGGTTTGTGCAGGCTGTG-3'<br>R: 5'-TGTTGTCCACCCAGAACTCATGGA-3' | 924-947<br>1086-1063   | 163                 |
| <i>Dio3</i>    | NM_017210.3     | F: 5'-TGTCAGCGCAGCAAGAGTACTTCA-3'<br>R: 5'-ATAGGCACCATATGCGGAACTGCT-3' | 677-700<br>773-750     | 97                  |
| <i>Mct8</i>    | NM_147216.1     | F: 5'-CATTGCGTTTGAAGTGGTGGG-3'<br>R: 5'-GCATCAGAGGGACGAAGAAAAGG-3'     | 1317-1327<br>1519-1497 | 203                 |
| <i>Dio2</i>    | NM_031720.3     | F: 5'-GAAGGACTACGCTGTGTCTGGAAC-3'<br>R: 5'-TCGCTGAACCAAAGTTGACCAC-3'   | 735-758<br>948-927     | 214                 |
| <i>Oatp1c1</i> | NM_053441.1     | F: 5'-TCACTCCCAACATCTCTCCGTG-3'<br>R: 5'-GTCTTCACTGGCGAAATCATCC-3'     | 823-845<br>1040-1019   | 218                 |
| <i>Rc3</i>     | NM_024140.2     | F: 5'-TGCTCCAAGCCAGACGACGATATT-3'<br>R: 5'-GGCCACACTCTCCACTCTTTATCT-3' | 274-297<br>406-283     | 133                 |
| <i>Egr1</i>    | NM_012551.2     | F: 5'-TCTGAATAACGAGAAGGCGCTGGT-3'<br>R: 5'-ACAAGGCCACTGACTAGGCTGAAA-3' | 243-266<br>401-378     | 159                 |
| <i>Dpysl3</i>  | NM_012934.1     | F: 5'-TTGGGAAGGACAACCTCACGGCTA-3'<br>R: 5'-TCGCTGTCAGAACCCACAGCTATT-3' | 1107-1130<br>1302-1279 | 196                 |
| <i>Dbm</i>     | NM_013158.2     | F: 5'-TGGAATCTTGGAGGAGATGTGCGT-3'<br>R: 5'-TGCCGAACCGTTTACTATGTGGA-3'  | 1458-1481<br>1585-1562 | 128                 |
| <i>Crym</i>    | NM_053955.1     | F: 5'-TGCAAGGAGATGTTCCGGTCTGTT-3'<br>R: 5'-TGCTTCATGAGCTCGTCATCCAGT-3' | 570-593<br>756-733     | 187                 |
| <i>Dmt1</i>    | NM_013173.1     | F: 5'-TGTGGCCTGGCGTTACG-3'<br>R: 5'-CGCAGAAGAACGAGGACCAA-3'            | 4102-4118<br>4165-4146 | 64                  |
| <i>TfR1</i>    | NM_022712.1     | F: 5'-GAATACGTTCCCCGTTGTTGA-3'<br>R: 5'-ATCCCCAGTTCCTAGATGAGCAT-3'     | 991-1001<br>1057-1035  | 67                  |

|                |             |                                                                        |                      |     |
|----------------|-------------|------------------------------------------------------------------------|----------------------|-----|
| <i>Bdnf</i>    | NM_012513.3 | F: 5'-GATGCTCAGCAGTCAAGTGCCTTT-3'<br>R: 5'-GACATGTTTGCGGCATCCAGGTAA-3' | 948-971<br>1034-1011 | 87  |
| <i>Bdnf IV</i> | EF125679.1  | F: 5'-AACAGGAGTACATATCGGCCACCA-3'<br>R: 5'-GCAGCCTTCATGCAACCGAAGTAT-3' | 186-209<br>417-394   | 232 |
| <i>Bdnf VI</i> | EF125680.1  | F: 5'-ACCAGGAGCGTGACAACAATGTGA-3'<br>R: 5'-GCAGCCTTCATGCAACCGAAGTAT-3' | 284-307<br>425-402   | 142 |
| <i>Gapdh</i>   | NM_017008.3 | F: 5'-TGCACCACCAACTGCTTAGC-3'<br>R: 5'-GGCATGGACTGTGGTCATGAG-3'        | 524-543<br>610-590   | 87  |

1

2 Genes: Parvalbumin, *Pvalb*; Ectonucleotide pyrophosphatase/phosphodiesterase 6, *Enpp6*;

3 Hairless, *Hr*; Myelin basic protein, *Mbp*; Myelin-associated oligodendrocyte basic protein, *Mobp*;

4 Angiotensinogen, *Agt*; Type 3 deiodinase, *Dio3*; Monocarboxylate transporter 8, *Mct8*; Type II

5 deiodinase, *Dio2*; Organic anion transporting polypeptide 1c1, *Oatp1c1*; Neurogranin, *Rc3*; Early

6 growth response factor 1, *Egr1*; Dihydropyrimidinase-like 3, *Dpysl3*; Dopamine beta-

7 monooxygenase, *Dbm*; Mu crystallin, *Crym*; Divalent metal transporter 1, *Dmt1*; Transferrin

8 receptor 1, *TfR1*; Brain-derived neurotrophic factor (total), *Bdnf*; Brain-derived neurotrophic

9 factor isoform IV, *Bdnf IV*; Brain-derived neurotrophic factor isoform VI, *Bdnf VI*;

10 Glyceraldehyde 3-phosphate dehydrogenase, *Gapdh*. F = Forward, R = Reverse

11

1 **Supplemental Figure Legends**

2 **Supplemental Figure 1: *Bdnf* mRNA expression is not altered in the Fe- or TH-deficient**

3 **neonatal cerebral cortex or hippocampus.** Hippocampi or cerebral cortices were harvested

4 from P10 male pups (n = 8 – 10), total RNA was extracted, and cDNA was synthesized.

5 Quantitative real-time PCR was performed for (A) Brain-derived neurotrophic factor (total), *Bdnf*

6 (B) Brain-derived neurotrophic factor isoform IV, *Bdnf IV* (C) Brain-derived neurotrophic factor

7 isoform VI, *Bdnf VI*. Relative mRNA levels are calculated relative to an internal control cDNA

8 sample. Data are presented as the mean ± SEM. Groups not sharing a common superscript are

9 significantly different by one-way ANOVA and Tukey's or Scheffe's multiple comparison test (P

10 < 0.05). Cu deficiency did not impact serum and brain TH concentrations or TH-responsive gene

11 expression and thus was excluded from mRNA expression analysis. The 3 ppm PTU group

12 served as a positive hypothyroid control. Asterisks indicate statistical difference between 3 ppm

13 PTU and control.

14

15 **Supplemental Figure 2: Relationship between serum total T4 and brain regional mRNA**

16 **levels.** Linear regression scatter plots demonstrating the relationship between serum total T4

17 concentrations and either hippocampus or cerebral cortex mRNA levels in individual rat pups are

18 shown for several genes. (A) Organic anion transporting polypeptide 1c1, *Oatp1c1* (B)

19 Dihydropyrimidinase-like 3, *Dpysl3* (C) Dopamine beta-monoxygenase, *Dbm* (D) Brain-derived

20 neurotrophic factor (total), *Bdnf* (E) Brain-derived neurotrophic factor isoform IV, *Bdnf IV* (F)

21 Brain-derived neurotrophic factor isoform VI, *Bdnf VI* (G) Mu crystallin, *Crym* (H) Divalent

22 metal transporter 1, *Dmt1* (I) Transferrin receptor 1, *TfR1*. The slope, y-intercept, and Pearson

23 correlation R<sup>2</sup> values are shown for each linear regression analysis. Asterisks indicate

24 relationships with slopes that significantly deviate from zero (P < 0.05).

25

1 **Supplemental Figure 3: Crym mRNA is highly expressed in the adult and neonatal**  
2 **hippocampus and the tanycytes lining the 3<sup>rd</sup> ventricle.** *In situ* hybridization images  
3 demonstrating Crym mRNA expression patterns in the mouse brain were downloaded with  
4 permission from the Allen Brain Atlas (ABA) website (Reference a). A description of the site and  
5 the methods used by ABA can be found in Reference b. A) The image shows Crym mRNA  
6 expression by *in situ* hybridization in a postnatal day 14 mouse brain sagittal section. B) The same  
7 image as in panel A is shown using ABA's expression analysis tool. C) The image shows Crym  
8 mRNA expression by *in situ* hybridization in an adult mouse brain coronal section. D) The same  
9 image as in panel A is shown using ABA's expression analysis tool. In panels A and C, cells with  
10 high Crym mRNA expression have significant silver grain deposition and are black. In panels B  
11 and D, red coloring indicates cells with high Crym mRNA expression, whereas blue indicates  
12 cells with low Crym expression as depicted in the legend in the upper right hand corner of each  
13 image. References:

14 A. Allen Brain Atlas [Internet]. Seattle (WA): Allen Institute for Brain Science. © 2009.  
15 Available from: <http://www.brain-map.org>.

16 B. Lein, E.S. et al., Genome-wide atlas of gene expression in the adult mouse brain, *Nature* 445:  
17 168-176 (2007), doi: 10.1038/nature05453

18

19

20

# Hippocampus

# Cerebral Cortex

## A

### *Bdnf*

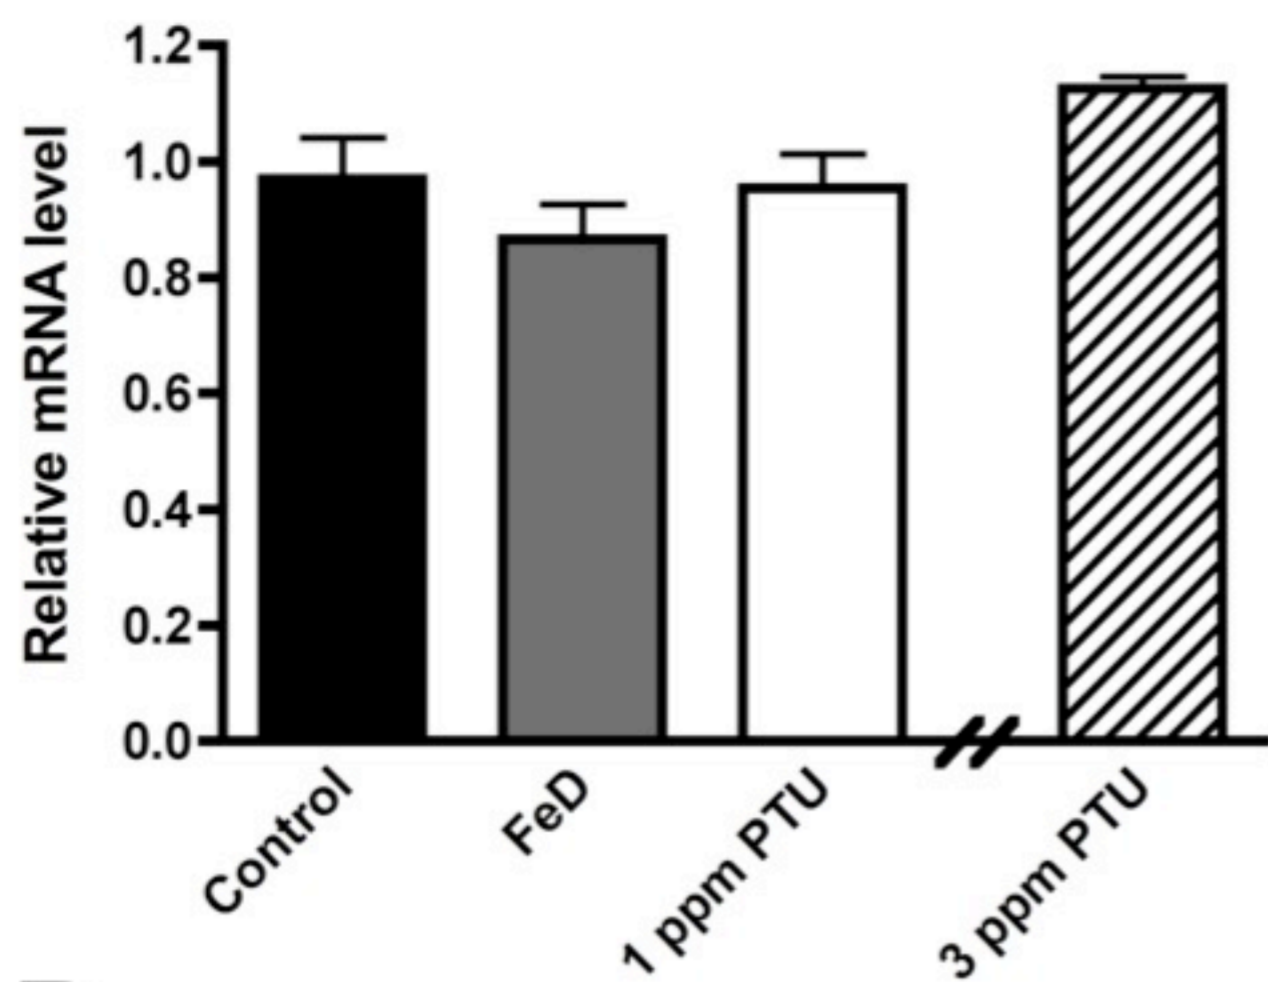

### *Bdnf*

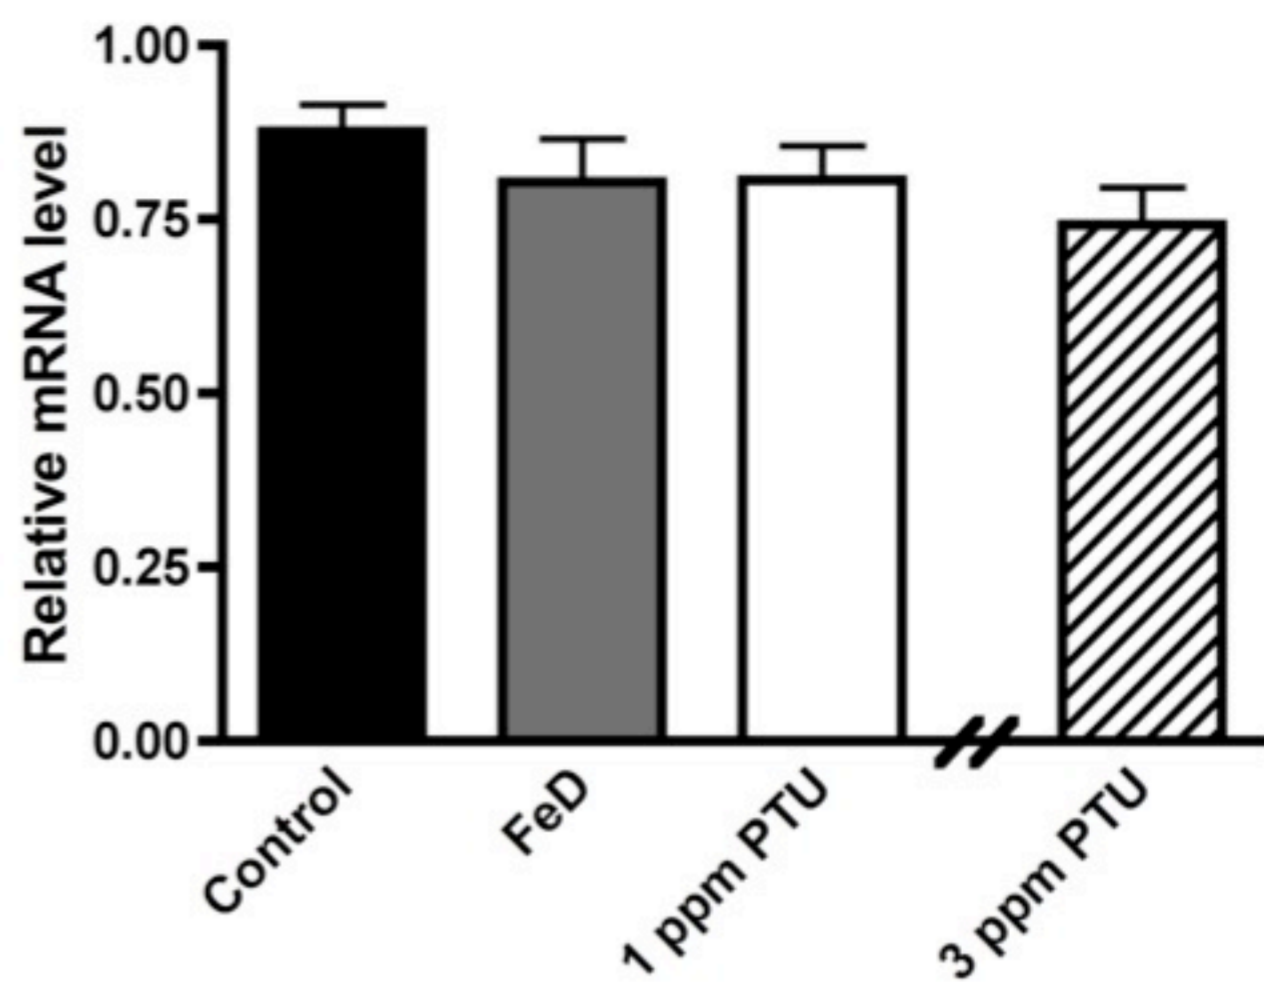

## B

### *Bdnf IV*

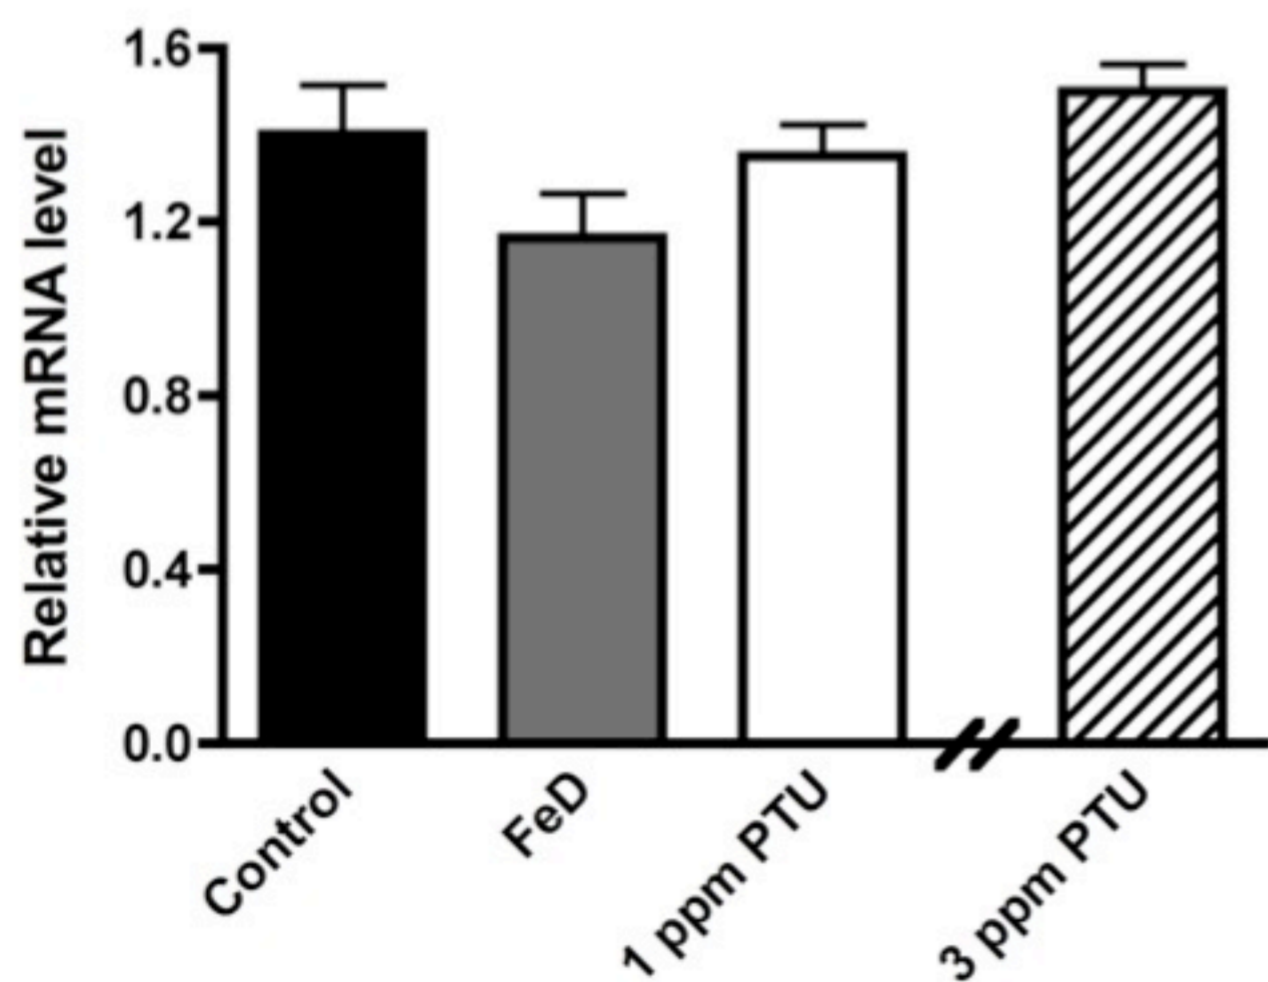

### *Bdnf IV*

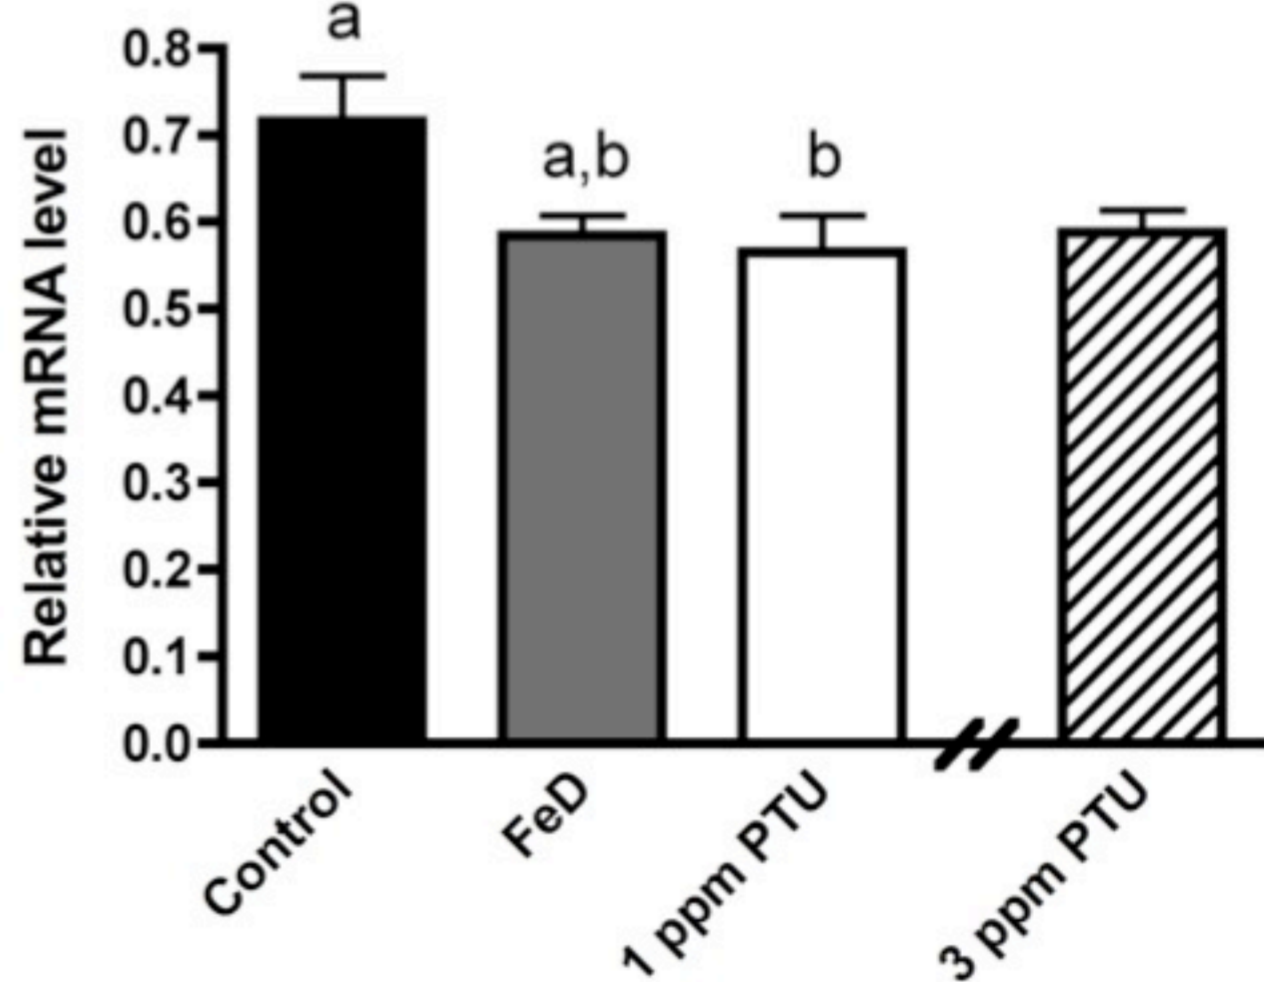

## C

### *Bdnf VI*

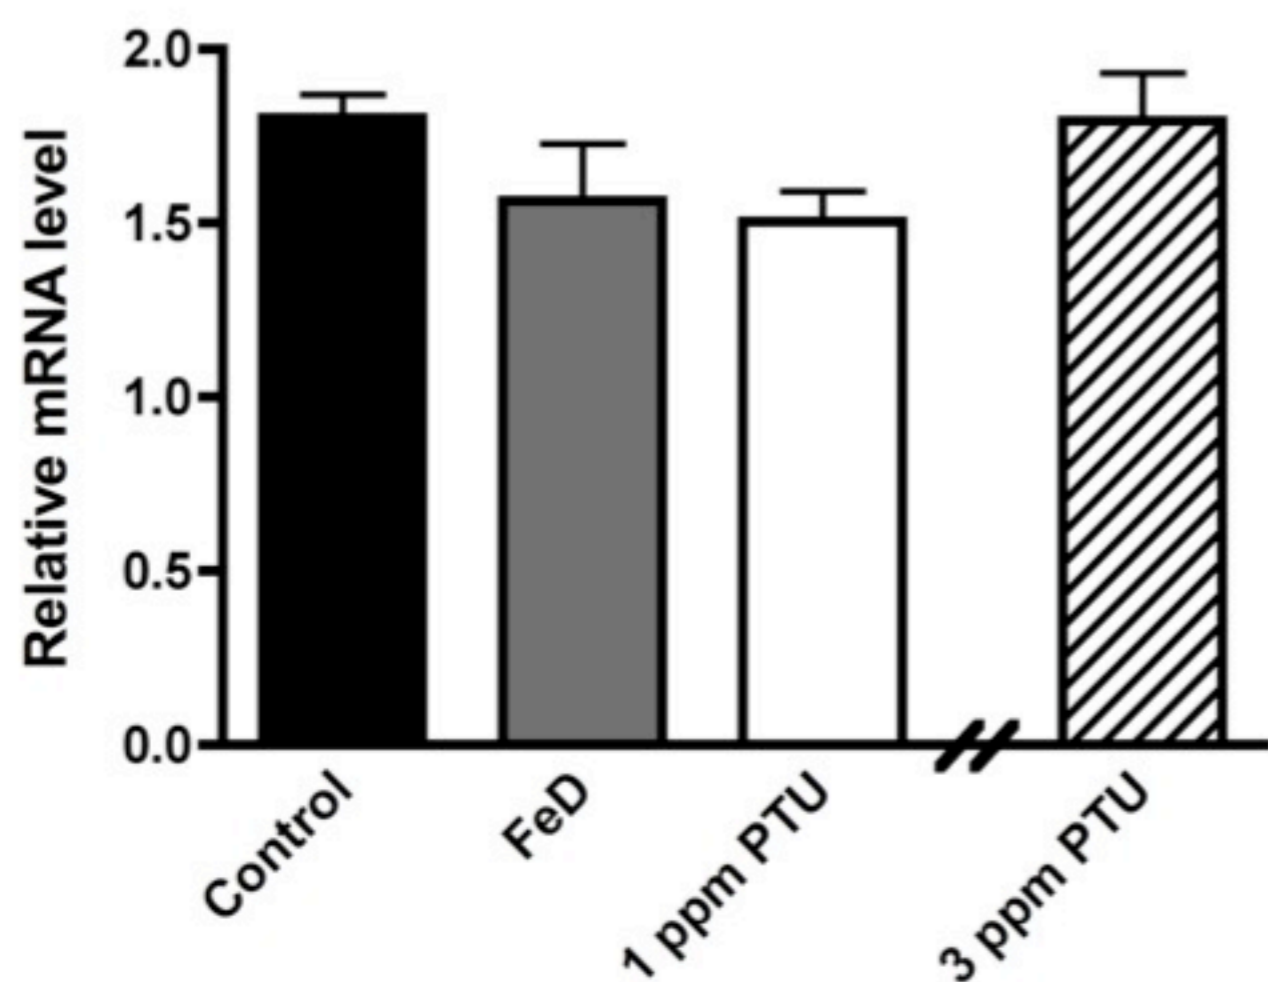

### *Bdnf VI*

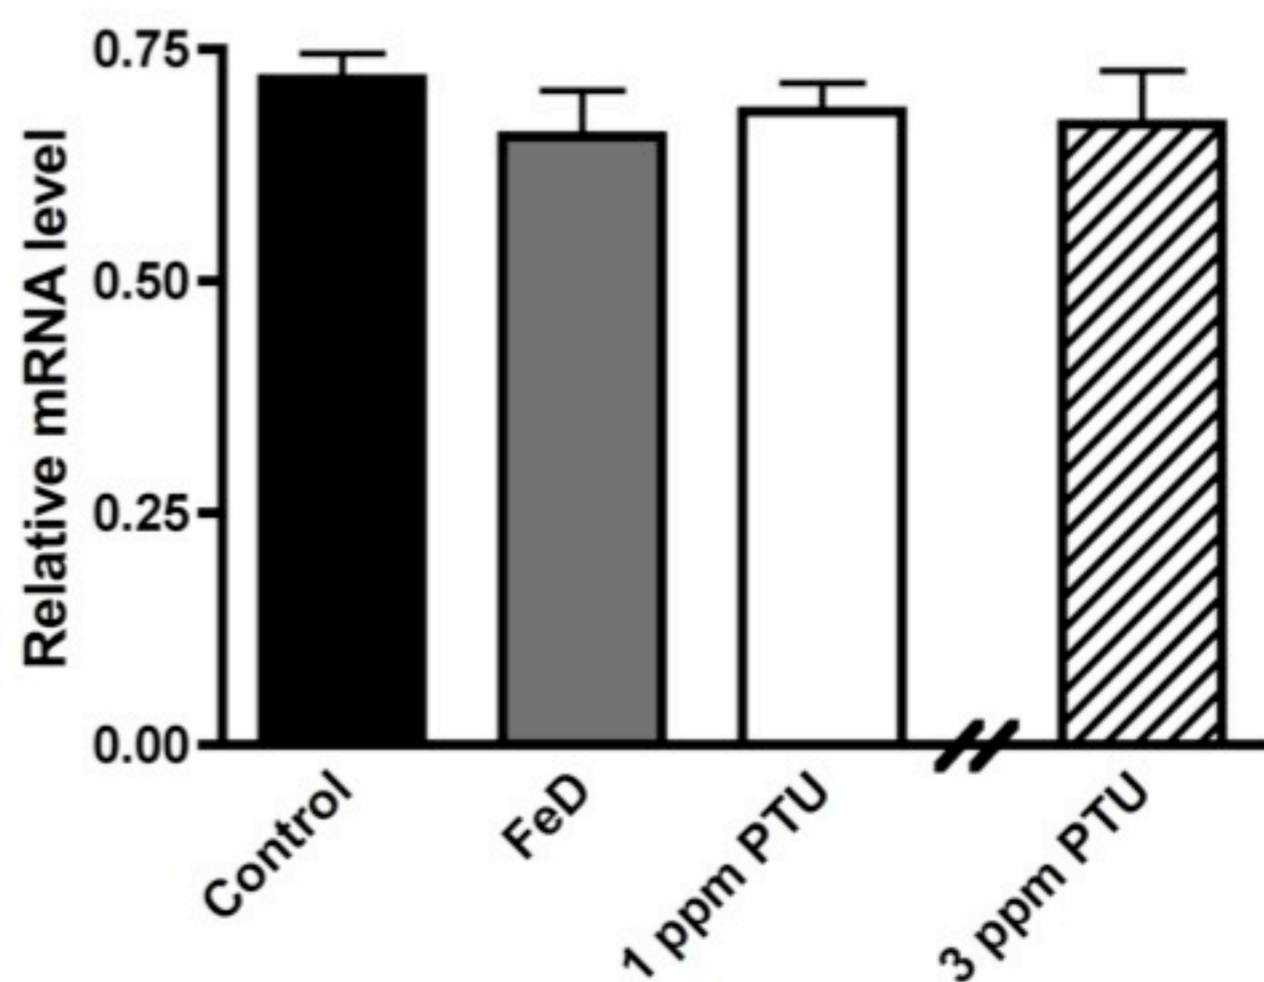

HippocampusCerebral CortexHippocampusCerebral Cortex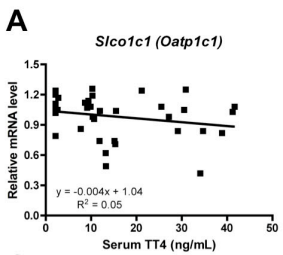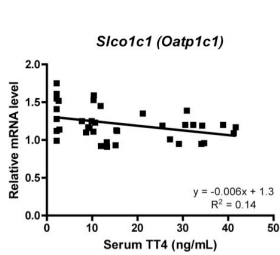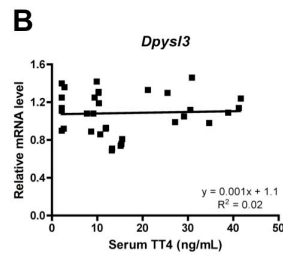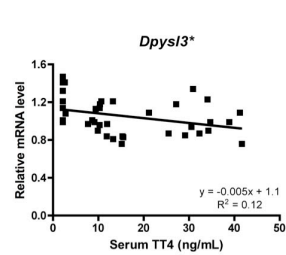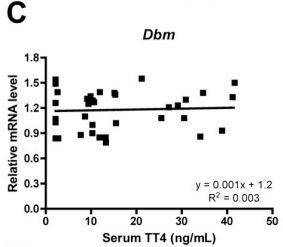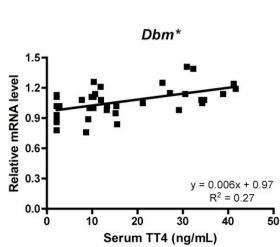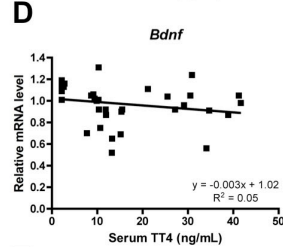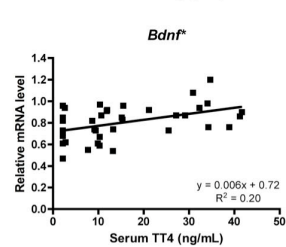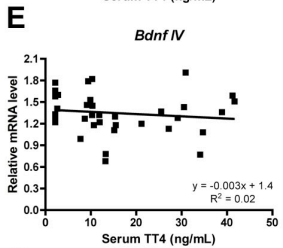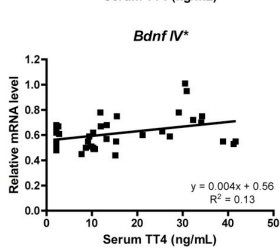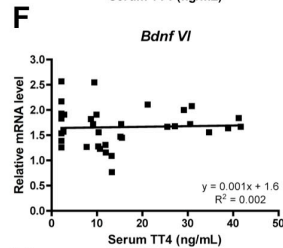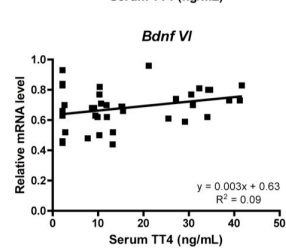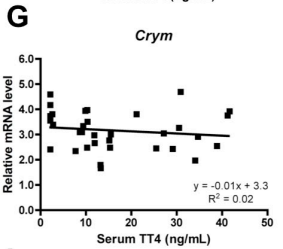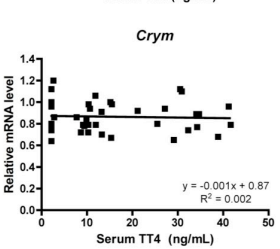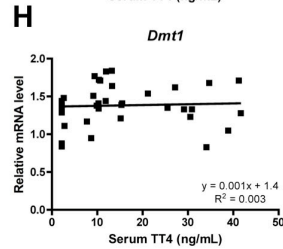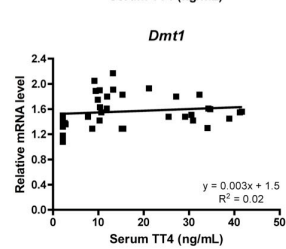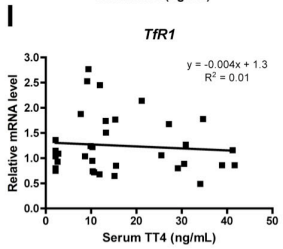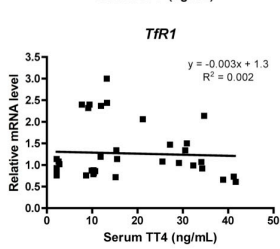



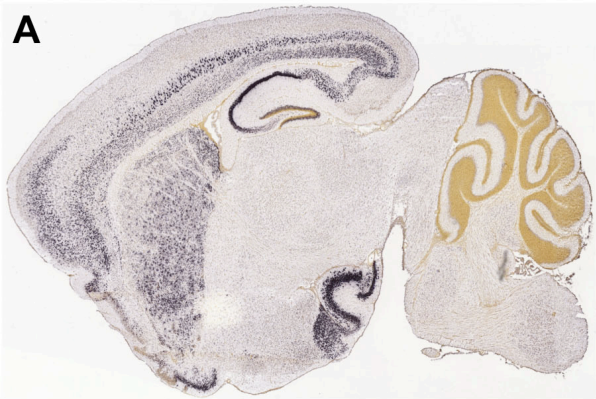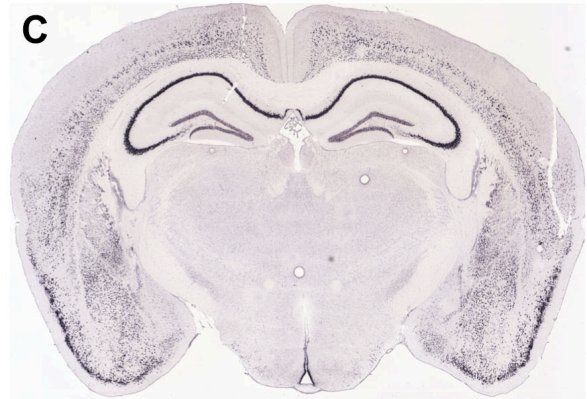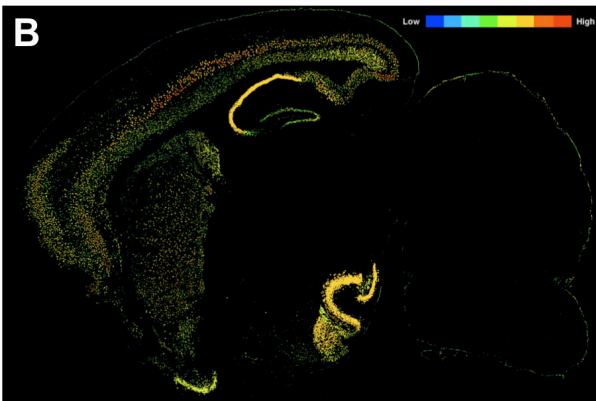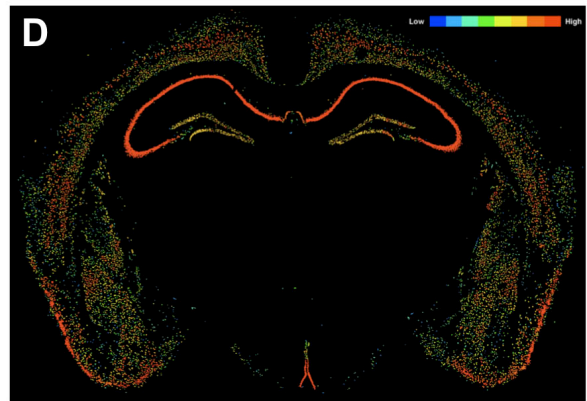

Supplement: supp_en.2012-1067v1_Supplemental_Files_EN-12-1067.pdf [file supp_en.2012-1067v1_Supplemental_Files_EN-12-1067.pdf]
